# Supplementary material for: The last chain of trauma survival: development of a scale for trauma-rehabilitation linkage in South Korea using a systematic review and expert consensus
Source: PubMed Central journal article supplement — Ann Surg Treat Res. 2024 Oct 29;107(5):274–83. doi: 10.4174/astr.2024.107.5.274 (PMC11543895; doi:10.4174/astr.2024.107.5.274), 2024-10-29
Supplement: astr-107-274-s001.pdf [file astr-107-274-s001.pdf]

**Supplementary Table 1.** Search strategy on PubMed

| Step | Search terms                                                                                                                                                                                                                                                                                                                                            | No. of publications |
|------|---------------------------------------------------------------------------------------------------------------------------------------------------------------------------------------------------------------------------------------------------------------------------------------------------------------------------------------------------------|---------------------|
| #1   | (((multiple trauma[MeSH Terms]) OR (trauma, nervous system[MeSH Terms])) OR (major trauma[Title/Abstract])) OR ("trauma"[All Fields]) NOT (spinal cord injury[MeSH Terms]) NOT (spinal cord injury[Title/Abstract])                                                                                                                                     | 495,492             |
| #2   | (((tool[Title/Abstract]) OR (assessment[Title/Abstract])) OR (measurement[Title/Abstract])) OR (scale[Title/Abstract]) OR (model[Title/Abstract])                                                                                                                                                                                                       | 4,857,247           |
| #3   | "plans"[Title/Abstract] OR "planned"[Title/Abstract] OR "planning"[Title/Abstract] OR "plannings"[Title/Abstract] OR "plans"[Title/Abstract] OR "patient education as topic"[MeSH Terms] OR "patient education"[Title/Abstract] OR "clinical decision rules"[MeSH Terms] OR "predict"[All Fields] OR "predict*"[All Fields] OR "prediction"[All Fields] | 2,394,436           |
| #4   | ("rehabilitation"[Title/Abstract] OR "neurological rehabilit*" [Title/Abstract]) OR (center, rehabilitation[MeSH Terms])                                                                                                                                                                                                                                | 199,370             |
| #5   | "discharges"[All Fields] OR "discharg*" [All Fields] OR "patient discharge"[MeSH Terms] OR ("patient"[All Fields] AND "discharge"[All Fields]) OR "patient discharge"[All Fields] OR "discharge"[All Fields] OR "disposition"[All Fields]                                                                                                               | 351,099             |
| #6   | #1 AND #2 AND #3 AND #4 AND #5                                                                                                                                                                                                                                                                                                                          | 333                 |
