# Supplementary material for: The last chain of trauma survival: development of a scale for trauma-rehabilitation linkage in South Korea using a systematic review and expert consensus
Source: PubMed Central journal article supplement — Ann Surg Treat Res. 2024 Oct 29;107(5):274–83. doi: 10.4174/astr.2024.107.5.274 (PMC11543895; doi:10.4174/astr.2024.107.5.274), 2024-10-29
Supplement: astr-107-274-s002.pdf [file astr-107-274-s002.pdf]

**Supplementary Table 2.** Search strategy on Embase

| Step | Search terms                                                                                                                       | No. of publications |
|------|------------------------------------------------------------------------------------------------------------------------------------|---------------------|
| #1   | 'tool' OR 'assessment' OR 'measurement' OR 'model'                                                                                 | 8,726,051           |
| #2   | 'plan' OR 'planning' OR 'prediction' OR 'predicting' OR 'patient education' OR 'clinical decision making'                          | 1,887,572           |
| #3   | 'rehabilitation' OR 'rehabilitation center' OR 'neurorehabilitation' OR 'neurological rehabilit*'                                  | 704,081             |
| #4   | 'hospital discharge' OR 'discharge' OR 'disposition index' OR 'disposition'                                                        | 490,699             |
| #5   | ('multiple trauma' OR 'trauma' OR 'major trauma' OR 'injury') NOT ('spinal cord disease' OR 'spinal cord injury' OR 'spinal cord') | 1,933,515           |
| #6   | #1 AND #2 AND #3 AND #4 AND #5                                                                                                     | 572                 |
