# Supplementary material for: The last chain of trauma survival: development of a scale for trauma-rehabilitation linkage in South Korea using a systematic review and expert consensus
Source: PubMed Central journal article supplement — Ann Surg Treat Res. 2024 Oct 29;107(5):274–83. doi: 10.4174/astr.2024.107.5.274 (PMC11543895; doi:10.4174/astr.2024.107.5.274), 2024-10-29
Supplement: astr-107-274-s003.pdf [file astr-107-274-s003.pdf]

**Supplementary Table 3.** Search strategy on Cochrane Library

| Step | Search terms                                                                                                                                                                  | No. of publications |
|------|-------------------------------------------------------------------------------------------------------------------------------------------------------------------------------|---------------------|
| #1   | MeSH descriptor: [Multiple Trauma] explode all trees                                                                                                                          | 246                 |
| #2   | (major trauma):ti,ab,kw OR (trauma):ti,ab,kw NOT ("spinal cord injury"):ti,ab,kw                                                                                              | 16,549              |
| #3   | MeSH descriptor: [Trauma, Nervous System] explode all trees                                                                                                                   | 5,907               |
| #4   | MeSH descriptor: [Spinal Cord Injuries] explode all trees                                                                                                                     | 1,875               |
| #5   | MeSH descriptor: [Spinal Cord] explode all trees                                                                                                                              | 717                 |
| #6   | (#1 OR #2 OR #3) NOT (#4 OR #5)                                                                                                                                               | 19,741              |
| #7   | ("plan" OR "plans" OR "planning" OR "planned"):ti,ab,kw OR (patient education):ti,ab,kw OR (clinical decision):ti,ab,kw OR ("predict*" OR "prediction" OR "predict"):ti,ab,kw | 138,384             |
| #8   | (discharge):ti,ab,kw OR (patient discharge):ti,ab,kw OR (hospital discharge):ti,ab,kw OR (disposition):ti,ab,kw                                                               | 40,426              |
| #9   | (rehabilitation):ti,ab,kw OR (rehabilitation center):ti,ab,kw OR (neurological rehabilit*):ti,ab,kw                                                                           | 55,281              |
| #10  | MeSH descriptor: [Patient Discharge] explode all trees                                                                                                                        | 1,756               |
| #11  | MeSH descriptor: [Rehabilitation Centers] explode all trees                                                                                                                   | 694                 |
| #12  | MeSH descriptor: [Patient Education as Topic] explode all trees                                                                                                               | 9,269               |
| #13  | MeSH descriptor: [Clinical Decision Rules] explode all trees                                                                                                                  | 19                  |
| #14  | #7 OR #12 OR #13                                                                                                                                                              | 138,425             |
| #15  | #8 OR #10                                                                                                                                                                     | 40,426              |
| #16  | #9 OR #11                                                                                                                                                                     | 55,470              |
| #17  | MeSH descriptor: [Physical Functional Performance] explode all trees                                                                                                          | 339                 |
| #18  | MeSH descriptor: [Activities of Daily Living] explode all trees                                                                                                               | 10,159              |
| #19  | MeSH descriptor: [Disability Evaluation] explode all trees                                                                                                                    | 3,887               |
| #20  | #17 OR #18 OR #19                                                                                                                                                             | 13,857              |
| #21  | ("tool" OR "assessment" OR "measurement" OR "scale" OR "measure" OR "evaluation"):ti,ab,kw                                                                                    | 622,650             |
| #22  | #6 AND #14 AND #15 AND #16 AND #21                                                                                                                                            | 34                  |
| #23  | #6 AND #14 AND #20 AND #16 AND #21                                                                                                                                            | 14                  |
