# Supplementary material for: The last chain of trauma survival: development of a scale for trauma-rehabilitation linkage in South Korea using a systematic review and expert consensus
Source: PubMed Central journal article supplement — Ann Surg Treat Res. 2024 Oct 29;107(5):274–83. doi: 10.4174/astr.2024.107.5.274 (PMC11543895; doi:10.4174/astr.2024.107.5.274), 2024-10-29
Supplement: astr-107-274-s004.pdf [file astr-107-274-s004.pdf]

**Supplementary Table 4.** Expert group

| List           | Specialty               | Institution                                      |
|----------------|-------------------------|--------------------------------------------------|
| Ye Rim Chang   | Trauma surgery          | Seoul National University Hospital               |
| Junsik Kwon    | Trauma surgery          | Ajou University Hospital                         |
| Gil Jae Lee    | Trauma surgery          | Gachon University Gil Medical Center             |
| Sam Yeol Chang | Orthopedic surgery      | Seoul National University Hospital               |
| Jae-Woo Cho    | Orthopedic surgery      | Korea University Guro Hospital                   |
| Kyung-Hag Lee  | Orthopedic surgery      | National Medical Center                          |
| Se-Woong Chun  | Rehabilitation medicine | Gyeongsang National University Changwon Hospital |
| Hyun-Ho Kong   | Rehabilitation medicine | Chungbuk National University Hospital            |
| Goo Joo Lee    | Rehabilitation medicine | National Traffic Injury Rehabilitation Hospital  |
